# Supplementary material
Source: PubMed Central journal article supplement (PMC2850029)
Supplement: pp.109.150680_3.pdf [file pp.109.150680_3.pdf]

**Figure S3**

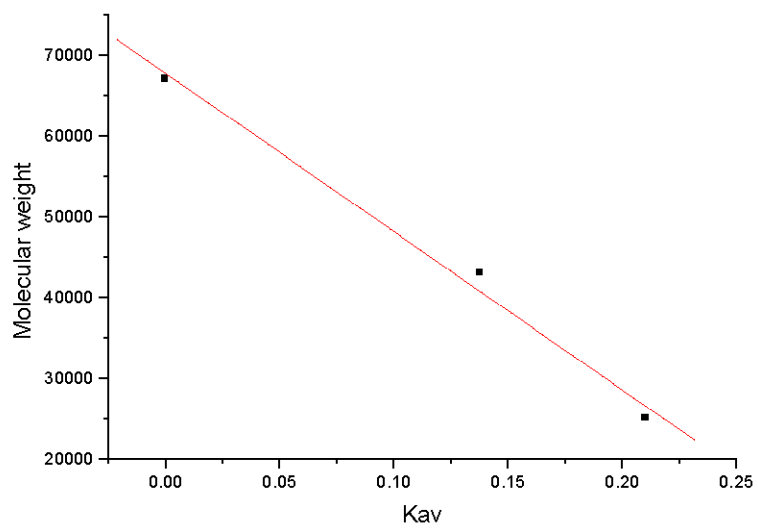

**Figure S3.** Gel filtration chromatography standard curve for molecular weight determination.
