# Supplementary material
Source: PubMed Central journal article supplement (PMC2850029)
Supplement: pp.109.150680_4.pdf [file pp.109.150680_4.pdf]

**Figure S4**

|           |     |                                                       |                                    |      |
|-----------|-----|-------------------------------------------------------|------------------------------------|------|
| LS-24_I   | 7   | NAAFRS.S.K.....N.N                                    | EAYFFINDKYVLLD.Y.AP..GS.SA..D....  | KV.  |
| LS-24_II  | 65  | DCSFDT...E.....N.N                                    | EAFIFYENFCALID.Y.AP..HKK..D....    | KI.  |
| LS-24_III | 121 | DAAYRS.T.R.....G.K                                    | EVYLFKGDQYARID.Y.G..S.....N....    | SM.  |
| LS-24_IV  | 175 | DAAFAS.H.K.....T.N                                    | EVYFFKDDHYARVK.V.TP...GGK...L....  | A.I  |
| 1GEN_I    | 476 | DGLAQI.....R.....G..                                  | EIFFFKDRFVLR.TVTP.....R..D.....    | K.PM |
| 1GEN_II   | 521 | DAVYEA...Q.....EE.                                    | KAVFFAGNEYWIYS...A.....S.....      | TL.  |
| 1GEN_III  | 569 | DAAFNWS.....K.....NK.                                 | KTYIFAGDKFWRVNE...VK....K.....     | KM.  |
| 1GEN_IV   | 618 | DAVVD.LQ..G.....GG.                                   | HSYFFKGGAYLKLLEN...Q....S.LK...S.V |      |
| 3BA0_I    | 290 | AVVT.V..G.....N..                                     | KIFFFKDRFFWL.K.V...SE...R..P.....  | KTS  |
| 3BA0_II   | 333 | EAAYEI..EA.....RN                                     | QVFLFKDDKYWLIS..N.....L.....       | RP.  |
| 3BA0_III  | 381 | DAAVFN..P.R.....FY.                                   | RTYFFVDNQYWRVDE...RR....Q.....     | MM.  |
| 3BA0_IV   | 430 | DAVFYS..K.....N..                                     | KYYFFQGSNQFEYD.F..L...L.Q.....     | R.I  |
| 1PEX_I    | 285 | DAITSL.....R.....G..                                  | ETMIFKDRFFVRLH...PQ...Q..V.....    | DA   |
| 1PEX_II   | 329 | DAAYEH...PS.....HD.                                   | LIFIFRGRKFWALN..G.....Y.....       | DI.  |
| 1PEX_III  | 378 | SAAVHF..E.D.....TG                                    | KTLLFSGNQVWRVYD.D..TN...H.....     | IM.  |
| 1PEX_IV   | 427 | DAVYEK...N.....G..                                    | YIYFFNGPIQFEYS.I..W...S..N....     | R.I  |
| 1SU3_I    | 285 | DAITTI.....R.....G..                                  | EVMFFKDRFYMR.....T.....            |      |
| 1SU3_II   | 329 | EAAYEF...AD.....RD.                                   | EVRFFKGNKYWAVQG...Q.....NV.        |      |
| 1SU3_III  | 378 | DAALSE..EN.....TG                                     | KTYFFVANKYWRVYD.E..YK...R.....     | SM.  |
| 1SU3_IV   | 427 | DAVFMK...D.....G..                                    | FFYFFHGTQRYKFD.P..K...T..K....     | R.I  |
| 1QHU_I    | 34  | DATFLD.D.N.....G..                                    | TMLFFKDEFVWKS...H.....RGI          |      |
| 1QHU_II   | 75  | DAAFRH...G.....H..T                                   | SVYLIKGDKVWVYT...S.....            |      |
| 1QHU_III  | 121 | DAAVEC...HRGECQ.....DE.                               | GILFFQGNRKWFVLDL...T...T..G....    | T.K  |
| 1QHU_IV   | 166 | TSALRW...LG.....RYY                                   | CFQGNQFLRN.P.V...SG...EV.          |      |
| 1HNX_IV   | 378 | ..ALCM...E..KPLGNSCSTSG.P.                            | NLYLIHGPNLYCYR.HV...D...K.LNAA...  |      |
| 1HXX_I    | 236 | SAMVS.DN..H.....G.                                    | ATYVFSGSHYWRLD.....                |      |
| 1HXX_II   | 281 | DAAFSW...E.....D..                                    | KLYLIQDTKVYVFLT...KG...GY...TL.    |      |
| 1HXX_III  | 333 | DAAFVC...PG.....S..S                                  | RLHIMAGRLLWVLDL.L..K...SG...AQATW  |      |
| :         |     |                                                       |                                    |      |
| LS-24_I   |     | L..Y.....GP.TPVRDG..F....                             | KSLN..QT...IFG.S..YG.I.....        | 64   |
| LS-24_II  |     | I..L.....G.P.KKIADV..F....                            | PFEE..GT..VFE...SG.I.....          | 120  |
| LS-24_III |     | V..N..A.....E.I.KSISSG...Y....                        | PCFR..NT...IFE...SG.A.....         | 174  |
| LS-24_IV  |     | M.....DG.V.REIVDY..W....                              | PSLK..DI...V...P...L.....          | 227  |
| 1GEN_I    |     | .....G.PLL..VATF...W...PE...L.....                    | PE...K.I.....                      | 520  |
| 1GEN_II   |     | E...R.....GY.P.KPLTSL.....G...L..P.....               | PD.VQ.RV.....                      | 568  |
| 1GEN_III  |     | D...P.....GF.P.KLIAD.A.W..N..A..I.....                | P.....DNL.....                     | 617  |
| 1GEN_IV   |     | .....KF..GSIKS.D.W...LG.....C.....                    |                                    | 660  |
| 3BA0_I    |     | .....VN..LISS.L.W...PTL.....PS...G..I.....            |                                    | 332  |
| 3BA0_II   |     | E...P.....NY.P.KSI.HS...F...G...F.P.....              | N.FVKK.I.....                      | 380  |
| 3BA0_III  |     | D...P.....GY.P.KLITKN...F...Q..GI.....G.....          | PK.I.....                          | 429  |
| 3BA0_IV   |     | T..K.....TLKS.N..SW.F.G.....C.....                    |                                    | 470  |
| 1PEX_I    |     | .....EL..FLTKSE.....W...PEL.....P.....                | NR.I.....                          | 328  |
| 1PEX_II   |     | L..E.....GY.P.KKI.SE...L..G...LP.....L.P.....         | K.EVK.KI.....                      | 376  |
| 1PEX_III  |     | D...K.....DY.P.RLIEED...F...P...GI.....G.D.....       | K.V.....                           | 426  |
| 1PEX_IV   |     | V..R.....VMPANSILWC.....                              |                                    | 466  |
| 1SU3_I    |     | N.P..FYPE...V.E.L.NFISVF...W...P...QL.....P.....      | NG.L.....                          | 328  |
| 1SU3_II   |     | L..H.....GY.P.KDIYSSE...G...FP.....RTVK.HI.....       |                                    | 377  |
| 1SU3_III  |     | D...P.....GY.P.KMIAHDF...P...GI.....G.....            | HK.V.....                          | 426  |
| 1SU3_IV   |     | L..T.....LQKA.N..SW.F.N...C.....                      |                                    | 466  |
| 1QHU_I    |     | .....R..EL.ISER...W...KN...F...IG...P.V.....          |                                    | 74   |
| 1QHU_II   |     | .....P.KSLQDE...F...P...GI.....P.....                 | FPL.....                           | 113  |
| 1QHU_III  |     | ..K.....E..RS.WP.....A.V.....G...N.C.....             |                                    | 165  |
| 1QHU_IV   |     | ...P.P.....GY.P.LDVRD...Y.....                        |                                    | 204  |
| 1HXX_IV   |     | .....KNLP.Q.P.QRVSRL...L.....G.....                   |                                    | 434  |
| 1HXX_I    |     | TNR.D.G...W.H.S.WPIAHQ...W...PQG..P.....S.....        | T.V.....                           | 280  |
| 1HXX_II   |     | V...N.....GYP..KRLEKEL...G...S..P.PVI.....SLE.AV..... |                                    | 332  |
| 1HXX_III  |     | ...T.....EL..PW.....P.....H...EK.V.DG...              |                                    | 377  |

**Figure S4.** Structure-based multiple sequence alignment of repeat sequences.

Structure-based multiple sequence alignment of hemopexin domains from MMPs, mammalian serum hemopexin and LS-24. The sequences have been designated by the PDB codes and by Roman numerals based on the location of blade with respect to the N-terminal of the fold. The sequence alignment presents the discernible insertions in the sequences of hemopexin folds. The linker regions in the case of LS-24 are longer and comprises of three short  $\alpha$ -helices of one turn, in comparison to shorter linker with a single  $\alpha$ -helix in other hemopexin domains of the mammalian origin. Sequences highlighted with yellow and turquoise, demarcate  $\beta$ -sheet and  $\alpha$ -helix respectively.
